# Supplementary material for: Cardiovascular safety of methylphenidate among children and young people with attention-deficit/hyperactivity disorder (ADHD): nationwide self controlled case series study
Source: PubMed Central journal article supplement — BMJ. 2016 May 31;353:i2550. doi: 10.1136/bmj.i2550 (PMC4887614; doi:10.1136/bmj.i2550), 2016-05-31
Supplement: shij029971.ww1_default.pdf [file shij029971.ww1_default.pdf]

**Appendix: Incidence rate, age adjusted ratio, and fully adjusted ratio of cardiovascular adverse events before and after methylphenidate** [posted as supplied by author]

| <b>Risk Periods</b>                       | <b>N</b> | <b>Person-years</b> | <b>Incidence rate</b> | <b>Age adjusted rate ratio</b> |
|-------------------------------------------|----------|---------------------|-----------------------|--------------------------------|
| <b>Arrhythmias</b>                        |          |                     |                       |                                |
| Unexposed                                 | 630      | 2,707               | 2.06 (1.95 to 2.18)   | 1.00                           |
| Exposed                                   | 234      | 749                 | 3.41 (3.16 to 3.67)   | 1.66 (1.51 to 1.82)            |
| Times since initiation of methylphenidate |          |                     |                       |                                |
| 1-3 days                                  | 24       | 52                  | 4.91 (4.29 to 5.60)   | 2.42 (2.11 to 2.78)            |
| 4-7 days                                  | 26       | 68                  | 4.04 (3.56 to 4.60)   | 2.00 (1.75 to 2.28)            |
| 8-14 days                                 | 35       | 109                 | 3.42 (3.06 to 3.82)   | 1.69 (1.50 to 1.90)            |
| 15-28 days                                | 45       | 152                 | 3.17 (2.87 to 3.50)   | 1.56 (1.41 to 1.74)            |
| 29-56 days                                | 51       | 145                 | 3.79 (3.44 to 4.16)   | 1.87 (1.69 to 2.07)            |
| > 56 days                                 | 53       | 224                 | 2.53 (2.29 to 2.80)   | 1.25 (1.12 to 1.40)            |
| <b>Hypertension</b>                       |          |                     |                       |                                |
| Unexposed                                 | 304      | 1,249               | 2.15 (1.98 to 2.33)   | 1.00                           |
| Exposed                                   | 92       | 335                 | 2.75 (2.43 to 3.10)   | 1.28 (1.11 to 1.48)            |
| Times since initiation of methylphenidate |          |                     |                       |                                |
| 1-3 days                                  | 6        | 22                  | 2.70 (2.08 to 3.50)   | 1.26 (0.96 to 1.64)            |
| 4-7 days                                  | 11       | 29                  | 3.75 (3.09 to 4.55)   | 1.74 (1.43 to 2.13)            |
| 8-14 days                                 | 8        | 47                  | 1.69 (1.35 to 2.12)   | 0.79 (0.62 to 0.99)            |
| 15-28 days                                | 19       | 68                  | 2.78 (2.39 to 3.24)   | 1.29 (1.10 to 1.52)            |
| 29-56 days                                | 18       | 70                  | 2.60 (2.23 to 3.04)   | 1.21 (1.03 to 1.43)            |
| > 56 days                                 | 30       | 99                  | 3.17 (2.77 to 3.63)   | 1.47 (1.27 to 1.71)            |
| <b>Myocardial Infarction</b>              |          |                     |                       |                                |
| Unexposed                                 | 42       | 170                 | 1.56 (1.25 to 1.95)   | 1.00                           |
| Exposed                                   | 10       | 38                  | 2.70 (1.94 to 3.75)   | 1.73 (1.16 to 2.58)            |
| Times since initiation of methylphenidate |          |                     |                       |                                |
| 1-3 days                                  | 0        | 3                   | NA                    | NA                             |
| 4-7 days                                  | 0        | 3                   | NA                    | NA                             |
| 8-14 days                                 | 3        | 6                   | 5.84 (4.08 to 8.35)   | 3.44 (2.33 to 5.08)            |
| 15-28 days                                | 2        | 7                   | 2.99 (1.93 to 4.61)   | 1.76 (1.11 to 2.79)            |
| 29-56 days                                | 3        | 8                   | 4.32 (3.00 to 6.22)   | 2.55 (1.71 to 3.80)            |
| > 56 days                                 | 2        | 12                  | 1.88 (1.19 to 2.97)   | 1.11 (0.68 to 1.81)            |
| <b>Ischemic Stroke</b>                    |          |                     |                       |                                |
| Unexposed                                 | 57       | 210                 | 2.22 (1.86 to 2.65)   | 1.00                           |
| Exposed                                   | 10       | 58                  | 1.51 (1.05 to 2.16)   | 0.68 (0.45 to 1.03)            |
| Times since initiation of methylphenidate |          |                     |                       |                                |
| 1-3 days                                  | 1        | 3                   | 2.83 (1.56 to 5.13)   | 1.27 (0.69 to 2.33)            |
| 4-7 days                                  | 0        | 4                   | NA                    | NA                             |
| 8-14 days                                 | 3        | 7                   | 3.90 (2.74 to 5.56)   | 1.75 (1.21 to 2.54)            |
| 15-28 days                                | 0        | 11                  | NA                    | NA                             |
| 29-56 days                                | 4        | 13                  | 2.69 (1.95 to 3.71)   | 1.21 (0.85 to 1.71)            |
| > 56 days                                 | 2        | 20                  | 0.80 (0.51 to 1.26)   | 0.36 (0.22 to 0.58)            |
| <b>Heart Failure</b>                      |          |                     |                       |                                |
| Unexposed                                 | 40       | 149                 | 1.89 (1.41 to 2.53)   | 1.00                           |
| Exposed                                   | 4        | 27                  | 1.12 (0.63 to 1.96)   | 0.59 (0.32 to 1.09)            |
| Times since initiation of methylphenidate |          |                     |                       |                                |
| 1-3 days                                  | 0        | 2                   | NA                    | NA                             |
| 4-7 days                                  | 0        | 2                   | NA                    | NA                             |
| 8-14 days                                 | 1        | 4                   | 2.11 (1.11 to 3.99)   | 1.10 (0.57 to 1)               |
| 15-28 days                                | 1        | 4                   | 1.86 (0.99 to 3.48)   | 0.97 (0.51 to 1)               |
| 29-56 days                                | 0        | 5                   | NA                    | NA                             |
| > 56 days                                 | 2        | 10                  | 1.64 (0.96 to 2.79)   | 0.85 (0.48 to 2)               |

NA: not applicable
